# Supplementary material
Source: bioRxiv or medRxiv preprint supplement (https://www.biorxiv.org/highwire/filestream/137528/field_highwire_adjunct_files/0/458083-1.pdf)
Supplement: Supplementary file [file 458083-1.pdf]

## Supplementary Materials for

### A complete *Cannabis* chromosome assembly reveals adaptive admixture for elevated cannabidiol (CBD) production

5

Christopher J. Grassa<sup>1,2,3\*</sup>, Jonathan P. Wenger<sup>4</sup>, Clemon Dabney<sup>4</sup>, Shane G. Poplawski<sup>5</sup>, S. Timothy Motley<sup>5</sup>, Todd P. Michael<sup>5\*</sup>, C.J. Schwartz<sup>1†</sup>, George D. Weiblen<sup>4\*†</sup>

10

Correspondence to: [cj\\_grassa@fas.harvard.edu](mailto:cj_grassa@fas.harvard.edu), [tmichael@jcvl.org](mailto:tmichael@jcvl.org), [gweiblen@umn.edu](mailto:gweiblen@umn.edu)

15

#### **This PDF file includes:**

Materials and Methods  
Tables S1 to S5

20

#### **Other Supplementary Materials for this manuscript include the following:**

Data S1 F2.compositemap.25Jan2018.xlsx

25

## Materials and Methods

### Plant material

5 CRBRx, a high-CBDA cultivar (15% CBDA and 0.3% THCA), was grown indoors in Colorado. Plants were grown in a compost enriched soil. CBDRx plants were  
10 grown indoors at 20-25C and 55-70% humidity under a mixture of fluorescent T-5 lamps and 1100W High Pressure Sodium Lamps manufactured by PL Lights. We made clonal cuttings approximately 10cm in height that included stems and leaves. These were immediately transferred to 42mm coconut coir plugs for rooting, then a  
15 coconut and perlite blend once roots were observed, where they remained for 40 days. Plants were then transferred to soil in 10cm pots for for 4 weeks of vegetative growth. Rooting and vegetative growth conditions included an 18:6 hour light:dark cycle and water as needed. Plants were transferred to 20L pots 10 weeks of flowering conditions using a 12:12 our light:dark cycle. Plants were fertilized with a  
micronutrient blend certified by the Organic Materials Review Institute plus biochar. Under flowering conditions, plants were watered every 7-9 days. A single plant (CBDRx:18:580) was chosen while in the vegetative phase and recently emerged leaves were collected for DNA purification.

20 The genetic background and cultivation of the mapping population over which the linkage and QTL mapping are reported has been previously described (5). In brief, parental marijuana (Skunk#1) and hemp (Carmen) lines were sibling crossed for five generations to increase homozygosity. A single fifth-generation Skunk#1 female was fertilized with pollen from a single fifth-generation Carmen male. From the resulting  
25 seed, a single genetically female F1 (CO9) plant was isolated and vegetatively cloned. Stamen development was induced in mature pistillate CO9 clones via treatment with colloidal silver, resulting in monoecious plants. CO9 clones were fertilized with pollen from CO9 clones to produce an F2 seed generation. Female F2 plants were grown from seed to flowering maturity for 12 weeks under conditions previously  
30 described (5). Mature flowers of the parents and F2 plants were collected at harvest and dried for subsequent DNA purification.

A single male F1 (CO11) plant full-sibling to the F1 (CO9) from which the mapping  
35 population descended was grown from seed under vegetative light (16h light: 8hr dark) and high nitrogen nutrient conditions equivalent to the initial four weeks of growth used for the mapping population (5) except that LED lighting (Valoya R150-NS1; Valoya Oy, Helsinki, Finland) was used. Fresh recently emerged leaves were collected from this plant for high molecular weight DNA purification.

### Cannabinoid analysis

40 Cannabinoid analysis by GC was as described in Weiblen et al., (5).

### Agronomic trait phenotyping

45 F2 plants were grown for four weeks under vegetative conditions followed by eight weeks under flowering conditions (5). After twelve weeks of growth, plant height

was measured from the base of the primary stem to shoot apex after which plants were harvested at the stem base and dried for three weeks at ambient conditions. Dried plant tissue fractions (stems, leaves, inflorescences) were weighed and percent mass of each fraction was calculated relative to total harvested mass.

5

#### Illumina sequencing

We extracted DNA from 15-20 mg of dried flowers from each of Skunk#1, Carmen, and 96 F2 individuals using a microfuge-scale CTAB-buffer/organic extraction protocol (adapted from (11)). Isolated DNAs were quantified using the PicoGreen dsDNA assay kit (ThermoFisher), size-evaluated by Agilent TapeStation gDNA (Agilent, Santa Clara CA) and used as input for TruSeq DNA PCR-Free (Illumina, San Diego CA). All 96 PCR-free libraries from the F2 set were pooled on an equimolar basis using PicoGreen concentrations. Likewise, a second pool was created from the Skun#1 and Carmen libraries. We used quantitative PCR (qPCR) to assess functionality, which was approximately 25%. Each library pool was adjusted according to the qPCR results prior to sequencing. Libraries were sequenced on an Illumina HiSeq 2500 SBS V4 in 2x125bp read high-output mode (Illumina, San Diego CA) at the University of Minnesota Genomics Center. Raw reads were gently trimmed of low-quality bases and synthetic sequence using Trimmomatic (12).

10

15

20

For all Illumina data we trimmed reads of adapter sequence with Trimmomatic (12), aligned them to the reference assembly with BWA MEM (13), sorted and compressed the alignments with Samtools (14), and marked duplicates with Picard tools (15).

25

#### PacBio sequencing

Genomic DNA of the F1 was obtained from fresh young leaf tissue using a modified CTAB/organic extraction protocol (adapted from (11)) in which the extraction buffer was supplemented with antioxidants (0.5% sodium diethyldithiocarbamate, 10mM sodium metabisulfite), and a DNase inhibitor (200mM L-lysine). Precipitated DNAs were collected using a glass hook, rinsed with ethanol, and resuspended in deionized water. Genomic DNA was quantified using the PicoGreen dsDNA assay kit (ThermoFisher), size-evaluated by Agilent TapeStation gDNA and pulsed-field gel electrophoresis (PFGE), diluted to 50 ng/uL, and sheared via 20 passes through a 26G blunt needle. Shears were evaluated using PFGE. Approximately 15 µg of sheared and concentrated DNA was used as input into library prep using the SMRTbell Template Prep Kit 1.0 using a protocol for >30kb libraries (101-181-000 Version 05). The resulting library was size-selected with a 20 kb high-pass protocol using the PippinHT, and an additional DNA Damage Repair was performed to generate the final library. Sequencing was performed via diffusion loading with Sequel Binding Kit 2.0 and a mixture of Sequel Sequencing Kits 2.0 and 2.1.

30

35

40

#### Nanopore sequencing

Leaf material from the inbred CBDrx line was flash frozen in liquid nitrogen. 5 g of flash frozen leaf tissue was ground in liquid nitrogen and extracted with 20 mL CTAB/Carlson lysis buffer (100mM Tris-HCl, 2% CTAB, 1.4M NaCl, 20mM EDTA, pH 8.0) containing 20µg/mL proteinase K for 20 minutes at 55°C. The

45

DNA was purified by addition of 0.5x volume chloroform, which was mixed by inversion and centrifuged for 30 min at 3000 RCF, and followed by a 1x volume 1:1 phenol: [24:1 chloroform:isoamyl alcohol] extraction. The DNA was further purified by ethanol precipitation (1/10 volume 3 M sodium acetate pH 5.3, 2.5 volumes 100% ethanol) for 30 minutes on ice. The resulting pellet was washed with freshly-prepared ice-cold 70% ethanol, dried, and resuspended in 350 µL 1x TE buffer (10 mM Tris-HCl, 1 mM EDTA, pH 8.0) with 5 µL RNase A (Qiagen, Hilden) at 37°C for 30 min, followed by incubation at 4°C overnight. The RNase A was removed by double extraction with 24:1 chloroform:isoamyl alcohol, centrifuging at 22,600xg for 20 minutes at 4°C each time. An ethanol precipitation was performed as before for 3 hours at 4°C. The pellet was washed as before and resuspended overnight in 350 µL 1x TE.

Genomic DNA sample was further purified for Oxford Nanopore (ONT) sequencing with the Zymo Genomic DNA Clean and Concentrator-10 column (Zymo Research, Irvine, CA). The purified DNA was then prepared for sequencing following the protocol in the genomic sequencing kit SQK-LSK108 (ONT, Oxford, UK). Briefly, approximately 1 µg of purified DNA was repaired with NEBNext FFPE Repair Mix for 60 min at 20°C. The DNA was purified with 0.5X Ampure XP beads (Beckman Coulter). The repaired DNA was End Prepped with NEBNext Ultra II End-repair/dA tail module including 1 µl of DNA CS (ONT, Oxford, UK) and purified with 0.5X Ampure XP beads. Adapter mix (ONT, Oxford, UK) was added to the purified DNA along with Blunt/TA Ligase Master Mix (NEB, Beverly, MA) and incubated at 20°C for 30 min followed by 10 min at 65°C. Ampure XP beads and ABB wash buffer (ONT, Oxford, UK) were used to purify the library molecules and they were recovered in Elution Buffer (ONT, Oxford, UK). Purified library was combined with RBF (ONT, Oxford, UK) and Library Loading Beads (ONT, Oxford, UK) and loaded onto a primed R9.4 Spot-On Flow cell. Sequencing was performed with a MinION Mk1B sequencer running for 48 hrs. Resulting FAST5 files were base-called using the ONT Albacore software using parameters for FLO-MIN106, and SQK-LSK108 library type.

#### Full length cDNA sequencing with Oxford Nanopore

Fresh CBDrx leaf tissue was flash frozen in liquid nitrogen and ground to a fine powder using a mortar and pestle. RNA was extracted from the powder using the Qiagen Plant RNeasy Plant Mini Kit (Qiagen, Netherlands). RNA quality was assessed using a bioanalyzer. High quality RNA was used to generate full length cDNA using the cDNA-PCR Sequencing Kit (SQK-PCS108, Oxford Nanopore Technologies, Oxford, UK). Resulting libraries were sequenced on the Oxford Nanopore GridION sequencer (Oxford Nanopore Technologies, Oxford, UK) for 48 hrs.

#### Nanopore genome assembly

A total of 27 Gb of Oxford Nanopore sequence was generated on the MinION ONT platform. The resulting raw reads in fastq format were aligned (overlap) with minimap and an assembly graph (layout) was generated with miniasm2 (16). The resulting graph was inspected using Bandage (17). A consensus sequence was generated by mapping reads to the assembly with minimap2, and then Racon (18)

three times. Finally, the assembly was polished with pilon (19) three times using the Illumina paired-end 2x100 bp sequence; the Illumina reads were mapped to the consensus assembly using BWA (13). All assembly steps were carried out on a machine with 231 Gb RAM and 56 CPU.

5

### Assembly Results

We sequenced CBDRx to a 34x coverage using long read Oxford Nanopore Technology (ONT) and the F1 to a 5x circular consensus coverage using PacBio Single Molecule Real-Time (SMRT) long read sequencing for the purpose of comparing THCAS and CBDAS variation in our mapping population to CBDRx. Both genomes were assembled using a correction-less assembly pipeline that consisted of an overlap (minimap2), layout (miniasm2) consensus (racon), followed by a polishing step (pilon) using the 64x Illumina 2x100 bp paired end reads (20). The resulting CBDRx assembly was 746 Mbp in 1,986 contigs with an N50 length of 742 kb and the longest contig 4.5 Mbp, while the F1 assembly was 1,389 Mbp in 12,204 contigs with an N50 length of 172 kb and the longest contig 1.9 Mbp (Table S2). Both genomes have higher contig contiguity than the Cannabis genomes currently available (Table S1), and form the basis for a complete chromosome assembly.

10

15

20

### Genetic Linkage Map

Our core mapping population is made up of F2s germinated from seed collected from the CO9 clones. A pseudo F1 dataset was constructed by concatenating all F2 reads followed by random subsampling to a target genomic coverage of 100x. The pseudo F1 and parental reads were independently error corrected using k-mer histograms with k=25 with AllpathsLG (21). A de Bruijn graph was constructed from the error corrected pseudo F1 reads using McCortex assembler at k=19 (22). This program is unique in that genome assembly and variant discovery are performed simultaneously - reads are assembled, but the paths through “bubbles,” i.e. regions of the graph that diverge and rejoin are retained as variants. The bubble read coverage distribution is used to classify bubbles as repeats, homologous alleles, or errors. Parental reads and F2 reads were threaded through the graph independently. F2s were genotyped at variant sites at which Carmen and Skunk#1 were fixed for alternate alleles. Genotypes were updated via imputation using a sliding-window hidden markov model using LB-Impute (23) leveraging variant coverage information and physical linkage within a window of width 10 variants.

25

30

35

Segregation patterns of genotypes containing no missing data across the population that appeared at least ten times were selected for use as map markers. Markers exhibiting segregation distortion by Chi<sup>2</sup> test were low in number and are retained in the map (~10% of markers). Linkage groups and marker order were inferred using the ant colony optimization in AntMap (24) solution to the traveling salesman path. Recombinations were counted directly and divided by the number of gametes in the population (192) to infer genetic distance between adjacent markers and summed consecutively in linear order to give map position on a linkage group.

40

45

### Linkage mapping

Markers obtained from a high-density map made using Illumina data built using AntMap for 96 F2 individuals were used to produce a composite map built by adding markers from Weiblen (5) using JOINMAP 4.1 (Wageningen, the Netherlands). Linkage groups were assembled from independent log-of-odds scores (LOD) based on G-tests for independence of two-way contingency tables. Linkage groups with LOD > 3.0 and containing four or more markers were used to construct a linkage map using the Kosambi (25) function. The high-density composite linkage map comprises ten linkage groups, 1,235 total segregation patterns, a map distance of 818.6 cM and a mean intermarker distance of 0.66 cM.

#### QTL analysis

Cannabinoid profiles and biomass traits of the same 96 F2 individuals were analyzed with respect to the composite linkage map using Windows QTL CARTOGRAPHER v.2.5\_011 (26); WinQTLCart). Composite interval mapping was used to estimate LOD over a walk speed of 1.0 cM and significant associations between traits and linkage groups were identified using an experiment-wise ( $P = 0.05$ ) LOD threshold estimated in WinQTLCart using 1000 permutations. Results were plotted with MAPCHART 2.32 (Wageningen, the Netherlands).

#### Pseudomolecule generation

The genome assembly was evaluated for library contaminants using Blobtools (27) and the NCBI non-redundant database. Contigs with good evidence as derived from outside viridiplantae were removed. We aligned the genetic map bubbles to the CBDRx contigs with BWA (13). Contigs were deemed chimeric if they mapped to different linkage groups or more than 10 centimorgans away from each other and broken at the longest repeat between genetically mapped regions. An initial set of rough pseudomolecules were constructed by assigning contigs to linkage groups, ordering contigs by mean centimorgan (28), and orienting by cM position on either end. The F2 population was genotyped again via alignment to the rough pseudomolecules followed by LB-Impute. Population segregation patterns from this second round of genotyping were used to further saturate the genetic map if they increased map density without increasing the map length (29). Contigs were partitioned by linkage group and scaffolded with the Hi-C library using three iterations of Salsa (30). Allmaps was used to generate the final contig order and orientation with the template genetic map positions, second round genetic map positions, and Salsa contig positions as input. The pseudomolecules were further polished with an additional ten iterations of Racon followed by an additional ten iterations of Pilon. After chromosome-wide scaffolding and gap filling, 841 contiguous sequences spanning 714,498,588 bp were anchored to nuclear pseudomolecules. We genotyped the genetic mapping population for a third time against the CBDRx reference and visually inspected the segregation patterns for misorderings. We found most contigs to be largely collinear in genetic and physical space. We observed zero recombinants on a minority of contigs and were unable to resolve their relative order and orientation. This was the case for two of the three synthase-bearing contigs on chromosome 9. For these, we manually reordered the synthase-bearing contigs to be physically adjacent, as we could not find evidence supporting an alternative arrangement and such an arrangement is most parsimonious with study-wide results.

### Repeat and gene prediction and annotation

Full length LTRs were predicted using LTRfinder using the standard settings and 1 mismatch (31). The resulting full length LTRs were used to mask the genome using repeat masker (32). Four full-length cDNA nanopore read libraries were aligned to the reference with minimap2 (33) before and after error correction by Canu (34) of colocated batches. 142 RNAseq libraries found on the Sequence Read Archive were aligned to the reference with GSnaps (35) and assembled into transcripts with Stringtie (36). 4 high-coverage RNASeq libraries were assembled using Trinity (28) in both de-novo and reference-guided modes. Contaminate sequence was removed using Seqclean (15). The full-length cDNAs, Stringtie assembly, and Trinity transcripts were assembled into gene models with the Program to Assemble Spliced Alignments (37). Additional transcriptome assemblies from *Humulus lupulus* (38) and *Cannabis* were aligned to the reference with GMap. Genes were predicted ab initio using Augustus (39). Non redundant RefSeq proteins (40) for viridiplantae were clustered at 90% identity with CD-HIT (41). Representative sequences for each cluster were aligned to the reference genome using Diamond (42) —extra-sensitive. Pairwise hits were locally realigned with AAT (43) and Exonerate protein2genome. Repetitive sequence was identified using the set union of three programs: RepeatMasker, Tephra, and Red (44). EvidenceModeler was used to integrate all evidence for and against protein-coding genes. PASA was updated with these results.

### CBDRx chromosome assembly analysis

The CBDRx ONT-based contig assembly was further resolved into chromosomes using a genetic map derived from progeny of the F1. Using whole-genome-shotgun sequencing (WGS) we scored 96 F2 plants for 211,106 markers segregating in 1,235 high-confidence patterns resulting in ten linkage groups, which we then used to anchor the ONT-based contigs. The final chromosome-resolved assembly of CBDRx captured 90.8% of the gene space as predicted by Benchmarking Universal Single Copy Orthologs (BUSCO) (45). The CBDRx genes were predicted using a combination of *ab initio* and empirical data including full length cDNA sequenced using ONT long read sequencing, as described above. After masking 63% of the genome for repeats that were made up of 17,536 full length long terminal repeats (LTRs), 42,052 protein coding genes were predicted in the CBDRx assembly. We identified the 345-355 bp subtelomeric repeat that has been defined in *Humulus lupulus* (46), and the 224 bp centromeric repeat (47). That 17% of the reads mapped to the centromere repeat and 14% mapped to the subtelomeric repeat is consistent with their predicted size in the genome. These observations support the first complete *Cannabis* chromosome assembly and a framework for examining the genomic structure of the *THCAS* and *CBDAS* loci in association with quantitative traits.

### THCAS/CBDAS and coverage analysis

In addition to the gene prediction and annotation, and *CBDAS* and *THCAS* genes (AB292682 and AB057805 respectively) were used to search the final assembly. The *THCAS* and *CBDAS* gene sequence was blasted against the final CBDRx assembly to confirm their locations. We identified four locations on the genome with close hits to *synthases*: chr9:26 Mbp, ch9:29 Mbp, ch9 31 Mbp, and the more-distantly related

homologs at chr6:15 Mbp. To check that all of the genes were captured in the assembly a coverage analysis was performed. The Illumina reads were mapped to a single copy gene *GIGANTEA* (*GI*), one ribosomal cassette (18S-5S-26S) and the four version of the *synthase* genes. The results confirmed the 14 *synthase* genes and suggested 500-600 rDNA arrays, which is consistent with other genomes this size (Table S3). Coverage analysis in Carmen, Skunk#1 and Purple Kush (4) revealed 22, 24 and 30 *synthase* genes respectively.

### Comparative Genomics

Individuals with sequenced WGS libraries were genotyped with BCFtools. Genome-wide ancestry proportions at k=3 were estimated using ADMIXTURE (48). Individuals identified as having >99% ancestry were assigned to respective marijuana and hemp populations. A subset of segregating sites were selected for assigning ancestry tracts along chromosomes using a method intended to maximize informativeness and minimize linkage disequilibrium. Sites were ranked by Wright's *Fst* (49). Genetic positions for all segregating sites were interpolated along a B-spline function fitted to the empirically observed positions in the mapping population with coefficients penalized to maintain monotonicity (50). For each chromosome, the site with the highest *Fst* value and lowest genetic position was the first selected. Decreasing by *Fst* through all segregating sites, additional sites were selected so long as they were at least 0.03 cM from any previously selected site. Ancestry tracts were assigned by AncestryHMM (51) assuming a single pulse from hemp to marijuana eight generations in the past.

We obtained previously published population data from the original authors and genotyped individuals against the CBDRx reference using our standard pipeline including sites with a quality score greater than 500. In order to understand neutral population structure, we used Plink and Plink2 to filter the genotype matrix to minimize structure originating from familial relatedness, artifactual patterns in occupancy, selection, and genetic linkage. We selected a single representative individual from groups with KING-robust kinship coefficient greater than 0.015625. We retained bi-allelic sites called in at least 80% of individuals, with a minor allele frequency greater than 1%, observed heterozygosity less than 60%. We removed sites failing an exact test for Hardy-Weinberg at p-value of 1e-20 with a mid-p adjustment (52). We eliminated individuals genotyped at less than 90% of sites. We thinned sites for linkage disequilibrium in sliding windows with a width of 50 SNPs, a slide of 5 SNPs, and a variance inflation factor threshold of 2. We used this plink-filtered genotype matrix for PCA and k-means clustering, as well as Admixture analysis at k=3. We used the Population Branch Statistic to scan the genome for sites undergoing population-specific processes. We assigned individuals to populations based on their k-means cluster membership and retained all sites with a quality score greater than 500 for this analysis. We calculated *Fst* (53) for the three population pairs using VCFtools. The PBS is three population test. For populations (a,b,c):

PBS<sub>a</sub> =  $((T_{ab} + T_{ac} - T_{bc}) / 2)$   
PBS<sub>b</sub> =  $((T_{ab} + T_{bc} - T_{ac}) / 2)$   
PBS<sub>c</sub> =  $((T_{ac} + T_{bc} - T_{ab}) / 2)$   
with



$$\begin{aligned}T_{ab} &= -\log(1 - F_{st_{ab}}) \\T_{ac} &= -\log(1 - F_{st_{ac}}) \\T_{bc} &= -\log(1 - F_{st_{bc}})\end{aligned}$$

5

**Table S1. Sequenced Cannabis genomes fail to resolve the THCA/CBDA loci.**

| Cultivar                    | GenBank          | Research Group                        | Date     | Contigs | Coverage | N50     | CBDA/THCA genes | Contigs | Method                |
|-----------------------------|------------------|---------------------------------------|----------|---------|----------|---------|-----------------|---------|-----------------------|
| Purple Kush                 | ASM23057         | University of Toronto                 | 10/18/11 | 135,164 | 130x     | 16,377  | 5               | 5       | Illumina GA II; HiSeq |
| LA Confidential             | ASM151000        | Courtage Life Sciences                | 1/11/16  | 311,039 | 50x      | 2,649   | 6               | 6       | Illumina 454          |
| Chemdog91                   | Chemdog91_175268 | Courtage Life Sciences                | 1/11/16  | 175,088 | 300x     | 2,250   | 1               | 1       | Illumina GA II        |
| Cannatonic                  | ASM186575        | Phylos Bioscience                     | 11/3/16  | 11,110  | 130x     | 128,718 | 12              | 12      | PacBio                |
| Pineapple Banana Bubba Kush | ASM209043        | Steep Hill Genetics/ CU Boulder, CGRI | 4/13/17  | 18,355  | 72x      | 51,819  | 12              | 12      | PacBio                |
| Finola                      | 003417725.1      | University of Toronto. Anandia        | 8/22/18  | 10,878  | 97x      | 116,560 | 10              | 10      | PacBio                |

5

**Table S2. CBDRx and F1 genome assembly statistics.**

|                        | CBDRx       | F1 (Carmen x Skunk #1) |
|------------------------|-------------|------------------------|
| Contig (#)             | 1,986       | 12,202                 |
| Largest contig (bp)    | 4,475,621   | 1,889,784              |
| Total Length (bp)      | 747,554,284 | 1,389,290,832          |
| GC (%)                 | 33          | 34                     |
| N50 contig length (bp) | 742,283     | 172,909                |

**Table S3. Coverage analysis using Illumina reads and the assembled CBDAs/THCAs genes.**

|                   | <b>CBDRx</b>          | <b>Carmen</b>                                                 | <b>Skunk</b>                                            | <b>Purple Kush</b> |
|-------------------|-----------------------|---------------------------------------------------------------|---------------------------------------------------------|--------------------|
|                   | Nanopore;<br>Illumina | CD1_illumina;<br>Pacbio<br>(haplotype<br>resolved from<br>F1) | CF2_illumina;<br>Pacbio<br>(haplotype resolved from F1) | CanSat             |
| CBDAs Chr09 29 Mb | 5                     | 6                                                             | 8                                                       | 7                  |
| CBDAs_Chr09 30 Mb | 1                     | 2                                                             | 4                                                       | 7                  |
| BBE-like Chr06    | 1                     | 2                                                             | 2                                                       | 5                  |
| THCAs_Chr09 25 Mb | 7                     | 13                                                            | 10                                                      | 11                 |
|                   | 14                    | 22                                                            | 24                                                      | 30                 |
| F1                |                       | 46                                                            |                                                         |                    |
| Assembly          | 14                    | 43                                                            |                                                         | 5                  |

5

**Table S4. QTL composite interval mapping results of phenotypic traits.**

| Trait      | Chromosome# | Peak LOD | Peak LOD cM position | 1-LOD L | 1-LOD R | 2-LOD L | 2-LOD R |
|------------|-------------|----------|----------------------|---------|---------|---------|---------|
| %CBD       | 1           | 6        | 39.43                | 37.91   | 40.15   | 37.21   | 40.79   |
| %CBD       | 9           | 20.34    | 36.57                | 29.49   | 51.67   | 36.53   | 36.72   |
| %CBC       | 1           | 5.36     | 41.46                | 41.07   | 43.49   | 40.47   | 45.92   |
| %CBC       | 8           | 7.8      | 41.32                | 39.33   | 42.84   | 39.3    | 44.26   |
| %CBC       | 9           | 9.45     | 33.88                | 33.81   | 33.95   | 33.74   | 34.02   |
| %THC       | 3           | 5.19     | 41.65                | 38.95   | 42.72   | 38.93   | 42.83   |
| %THC       | 7           | 4.6      | 43                   | 41.71   | 43.38   | 40.31   | 44.28   |
| %THC       | 9           | 25.08    | 39.19                | 39.09   | 39.26   | 38.99   | 39.33   |
| %CBG       | 3           | 6.56     | 44.31                | 41.74   | 44.39   | 39.59   | 44.47   |
| %inflor    | 2           | 4.96     | 48.39                | 47.47   | 49.83   | 47.45   | 52.41   |
| %inflor    | 9           | 7.39     | 39.43                | 38.18   | 40.71   | 37.86   | 41.36   |
| totbio     | 2           | 5.35     | 9.6                  | 6.53    | 10.75   | 6       | 11.1    |
| totbio     | 9           | 6.2      | 35.47                | 32.9    | 36.48   | 30.62   | 36.96   |
| totcann    | 1           | 6.78     | 40.59                | 39.77   | 40.74   | 39.03   | 40.89   |
| totcann    | 3           | 11.38    | 40.22                | 40.08   | 40.34   | 38.57   | 40.5    |
| totcann    | 4           | 5.02     | 49.28                | 46.53   | 50.33   | 46.43   | 51.31   |
| totcann    | 7           | 5.83     | 50.24                | 49.86   | 51.7    | 47.35   | 52.22   |
| totcann    | 8           | 4.41     | 1.13                 | 0.01    | 1.91    | 0.01    | 3.94    |
| totcann    | 8           | 5.83     | 41.32                | 40.77   | 42.35   | 40.63   | 43.18   |
| logTHC/CBD | 9           | 60.23    | 38.89                | 38.82   | 38.95   | 38.75   | 39.03   |

**Data S1. (Separate file)**

Genetic Map: F2 Segregation Patterns

## References only cited in the SM

- 5 18. J. D. Doyle, J., A rapid DNA isolation procedure for small quantities of fresh leaf tissue. *Phytochemical Bulletin* **19**, 11-15 (1987).
19. A. M. Bolger, M. Lohse, B. Usadel, Trimmomatic: a flexible trimmer for Illumina sequence data. *Bioinformatics* **30**, 2114-2120 (2014).
20. H. Li, R. Durbin, Fast and accurate short read alignment with Burrows-Wheeler transform. *Bioinformatics* **25**, 1754-1760 (2009).
- 10 21. H. Li *et al.*, The Sequence Alignment/Map format and SAMtools. *Bioinformatics* **25**, 2078-2079 (2009).
22. Broad Institute, Picard Tools. *Broad Institute, Github repository*, (2016).
23. H. Li, Minimap and minimiasm: fast mapping and de novo assembly for noisy long sequences. *Bioinformatics* **32**, 2103-2110 (2016).
- 15 24. R. R. Wick, M. B. Schultz, J. Zobel, K. E. Holt, Bandage: interactive visualization of de novo genome assemblies. *Bioinformatics* **31**, 3350-3352 (2015).
25. R. Vaser, I. Sovic, N. Nagarajan, M. Sikic, Fast and accurate de novo genome assembly from long uncorrected reads. *Genome Res* **27**, 737-746 (2017).
- 20 26. B. J. Walker *et al.*, Pilon: an integrated tool for comprehensive microbial variant detection and genome assembly improvement. *PLoS One* **9**, e112963 (2014).
27. T. P. Michael *et al.*, High contiguity Arabidopsis thaliana genome assembly with a single nanopore flow cell. *Nat Commun* **9**, 541 (2018).
- 25 28. S. Gnerre *et al.*, High-quality draft assemblies of mammalian genomes from massively parallel sequence data. *Proc Natl Acad Sci U S A* **108**, 1513-1518 (2011).
29. Z. Iqbal, M. Caccamo, I. Turner, P. Flicek, G. McVean, De novo assembly and genotyping of variants using colored de Bruijn graphs. *Nature Genetics* **44**, 226-232 (2012).
- 30 30. C. A. Fragoso, C. Heffelfinger, H. Zhao, S. L. Dellaporta, Imputing Genotypes in Biallelic Populations from Low-Coverage Sequence Data. *Genetics* **202**, 487-495 (2016).
- 35 31. H. Iwata, S. Ninomiya, AntMap: Constructing genetic linkage maps using an ant colony optimization algorithm. *Breeding Science* **56**, 371-377 (2006).
32. D. D. Kosambi, The Estimation of Map Distances from Recombination Values. *Annals of Eugenics* **12**, 172-175 (1944).
33. S. Wang, C. Basten, Z. Zeng, Windows QTL Cartographer 2.5. 2006.
- 40 34. D. R. a. B. Laetsch, Mark L, BlobTools: Interrogation of genome assemblies. *F1000Research* **6**, (2017).
35. B. J. Haas *et al.*, De novo transcript sequence reconstruction from RNA-seq using the Trinity platform for reference generation and analysis. *Nature Protocols* **8**, 1494-1512 (2013).
- 45 36. E. Dijkstra, A note on two problems in connexion with graphs. *Numerische mathematik* **1**, 269-271 (1959).

37. J. Ghurye, M. Pop, S. Koren, D. Bickhart, C. Chin, Scaffolding of long read assemblies using long range contact information. *BMC Genomics* **18**, 527 (2017).
38. Z. Xu, H. Wang, LTR\_FINDER: an efficient tool for the prediction of full-length LTR retrotransposons. *Nucleic Acids Res* **35**, W265-268 (2007).
39. N. Chen, Using RepeatMasker to identify repetitive elements in genomic sequences. *Current protocols in bioinformatics* **5**, 4-10 (2004).
40. H. Li, Minimap2: pairwise alignment for nucleotide sequences. *Bioinformatics* **34**, 3094-3100 (2018).
41. S. Koren *et al.*, Canu: scalable and accurate long-read assembly via adaptive k-mer weighting and repeat separation. *Genome Res* **27**, 722-736 (2017).
42. T. D. Wu, J. Reeder, M. Lawrence, G. Becker, M. J. Brauer, GMAP and GSNAP for Genomic Sequence Alignment: Enhancements to Speed, Accuracy, and Functionality. *Methods Mol Biol* **1418**, 283-334 (2016).
43. M. Pertea *et al.*, StringTie enables improved reconstruction of a transcriptome from RNA-seq reads. *Nat Biotechnol* **33**, 290-295 (2015).
44. B. J. Haas *et al.*, Automated eukaryotic gene structure annotation using EVIDENCEModeler and the program to assemble spliced alignments. *Genome Biology* **9**, (2008).
45. S. T. Hill, R. Sudarsanam, J. Henning, D. Hendrix, HopBase: a unified resource for *Humulus* genomics. *Database (Oxford)* **2017**, (2017).
46. K. J. Hoff, M. Stanke, WebAUGUSTUS-a web service for training AUGUSTUS and predicting genes in eukaryotes. *Nucleic Acids Research* **41**, W123-W128 (2013).
47. K. D. Pruitt, T. Tatusova, D. R. Maglott, NCBI reference sequences (RefSeq): a curated non-redundant sequence database of genomes, transcripts and proteins. *Nucleic Acids Res* **35**, D61-65 (2007).
48. L. Fu, B. Niu, Z. Zhu, S. Wu, W. Li, CD-HIT: accelerated for clustering the next-generation sequencing data. *Bioinformatics* **28**, 3150-3152 (2012).
49. B. Buchfink, C. Xie, D. Huson, Fast and sensitive protein alignment using DIAMOND. *Nat. Methods* **12**, 59-60 (2014).
50. X. Huang, M. D. Adams, H. Zhou, A. R. Kerlavage, A tool for analyzing and annotating genomic sequences. *Genomics* **46**, 37-45 (1997).
51. H. Z. Girgis, Red: an intelligent, rapid, accurate tool for detecting repeats de-novo on the genomic scale. *BMC Bioinformatics* **16**, 227 (2015).
52. F. A. Simao, R. M. Waterhouse, P. Ioannidis, E. V. Kriventseva, E. M. Zdobnov, BUSCO: assessing genome assembly and annotation completeness with single-copy orthologs. *Bioinformatics* **31**, 3210-3212 (2015).
53. M. G. Divashuk, O. S. Alexandrov, O. V. Razumova, I. V. Kirov, G. I. Karlov, Molecular cytogenetic characterization of the dioecious *Cannabis sativa* with an XY chromosome sex determination system. *PLoS One* **9**, e85118 (2014).
54. D. P. Melters *et al.*, Comparative analysis of tandem repeats from hundreds of species reveals unique insights into centromere evolution. *Genome Biol* **14**, R10 (2013).
55. D. H. Alexander, J. Novembre, K. Lange, Fast model-based estimation of ancestry in unrelated individuals. *Genome Res* **19**, 1655-1664 (2009).
56. S. Wright, Genetical structure of populations. *Nature* **166**, 247-249 (1950).



57. N. Pya, S. N. Wood, Shape constrained additive models. *Statistics and Computing* **25**, 543-559 (2015).
58. R. Corbett-Detig, R. Nielsen, A Hidden Markov Model Approach for Simultaneously Estimating Local Ancestry and Admixture Time Using Next Generation Sequence Data in Samples of Arbitrary Ploidy. *Plos Genetics* **13**, (2017).
59. J. Graffelman, V. Moreno, The mid p-value in exact tests for Hardy-Weinberg equilibrium. *Stat Appl Genet Mol Biol* **12**, 433-448 (2013).
60. B. S. Weir, C. C. Cockerham, Estimating F-Statistics for the Analysis of Population-Structure. *Evolution* **38**, 1358-1370 (1984).

5

10
